# Supplementary material for: Glacier-level and gridded mass change in the rivers' sources in the eastern Tibetan Plateau (ETPR) from 1970s to 2000
Source: Copernicus journal article supplement (doi:10.5194/essd-2024-255), 2024-07-23
Supplement: Supplementary file 1 [file essd-2024-255-supplement.pdf]

### Supplementary Tables

**Table S1.** Statistical evaluation of elevation difference correction in off-glacier areas of ETPR.

| Basin       | NMAD     |                 | Median   |                 |
|-------------|----------|-----------------|----------|-----------------|
|             | original | co-registration | original | co-registration |
| Ganges      | 15.22    | 12.99           | -4.96    | 1.02            |
| Brahmaputra | 17.30    | 14.61           | -3.08    | 0.59            |
| Salween     | 16.10    | 12.69           | -2.75    | 0.51            |
| Mekong      | 17.37    | 11.97           | -6.60    | 0.53            |
| Yangtze     | 12.47    | 8.70            | -4.95    | 0.40            |
| Yellow      | 9.30     | 7.71            | -1.08    | 0.38            |
| Irrawaddy   | 42.68    | 41.65           | 2.02     | -0.20           |

### Supplementary Figures

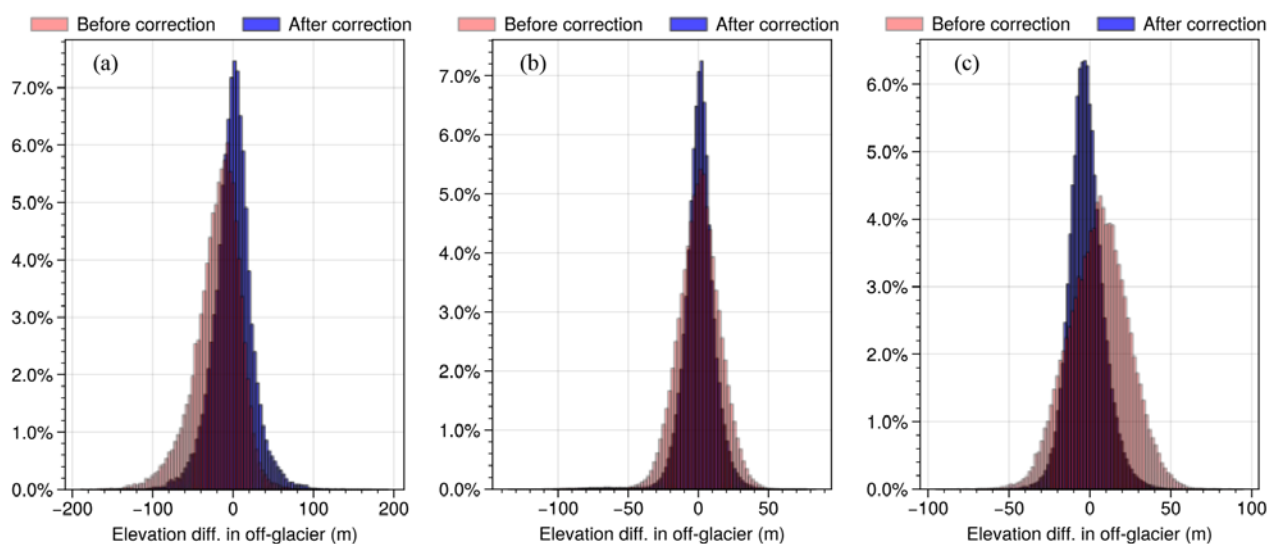

**Figure S1.** Impact of coregistration and bias correction on off-glacier elevation differences in the ETPR. The vertical axes in all subplots represent the ratio of pixels in each elevation difference zone to the total number of pixels. Briefly, subplots (a), (b), and (c) represent groups with underestimation, low-concentration, and overestimation of elevation difference, respectively.

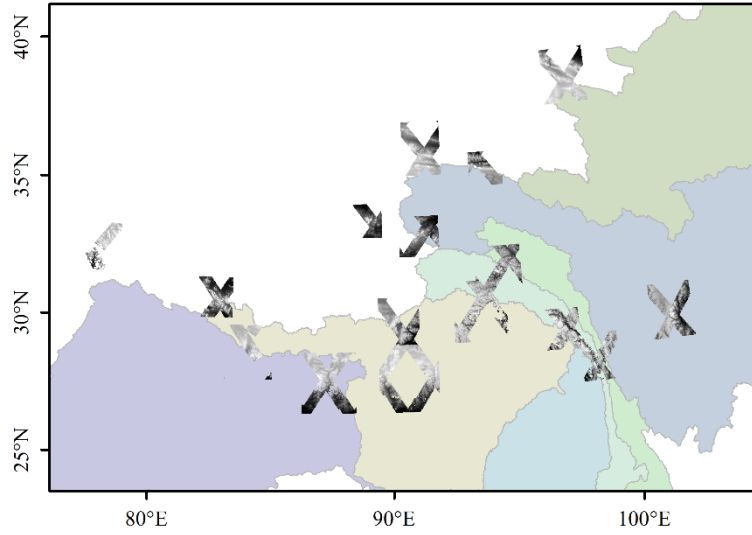

**Figure S2.** SRTM X-band images used in this study.

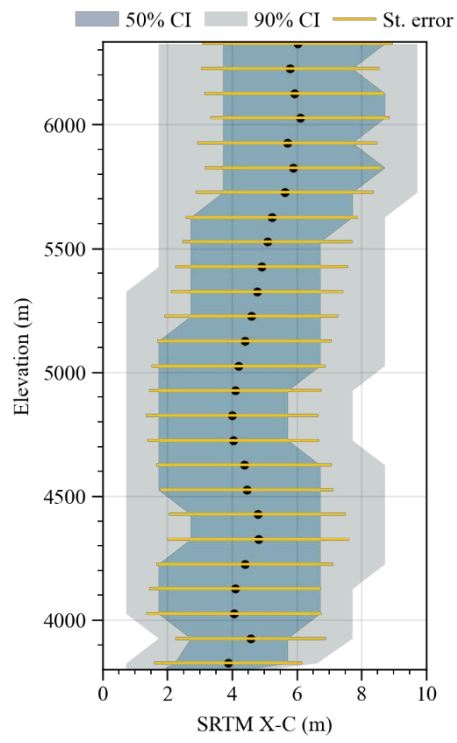

**Figure S3.** Distribution of the C-X band penetration depth along elevation.

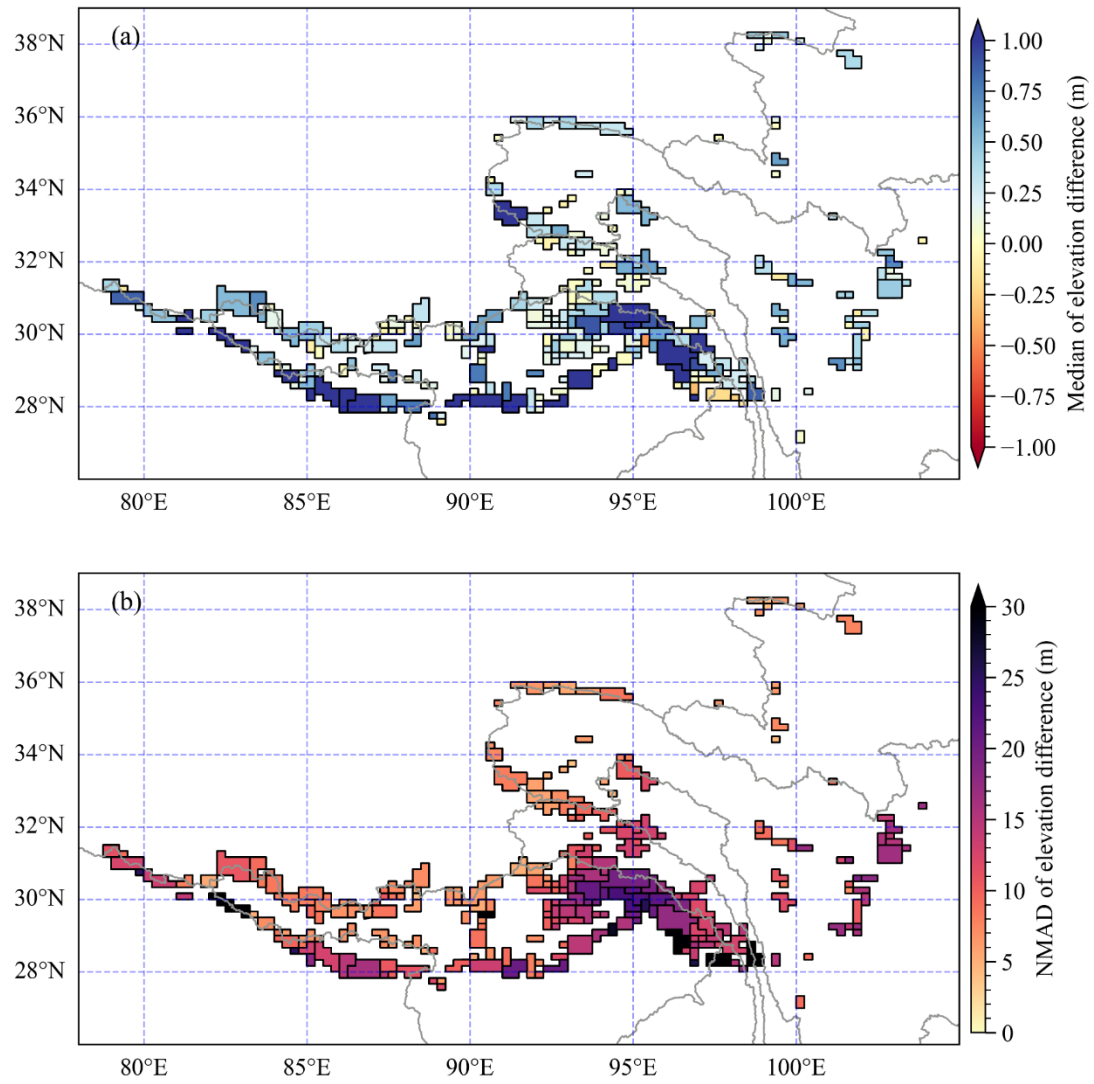

**Figure S4.** Spatial distribution of median (a) and NMAD (b) of elevation difference in stable areas.

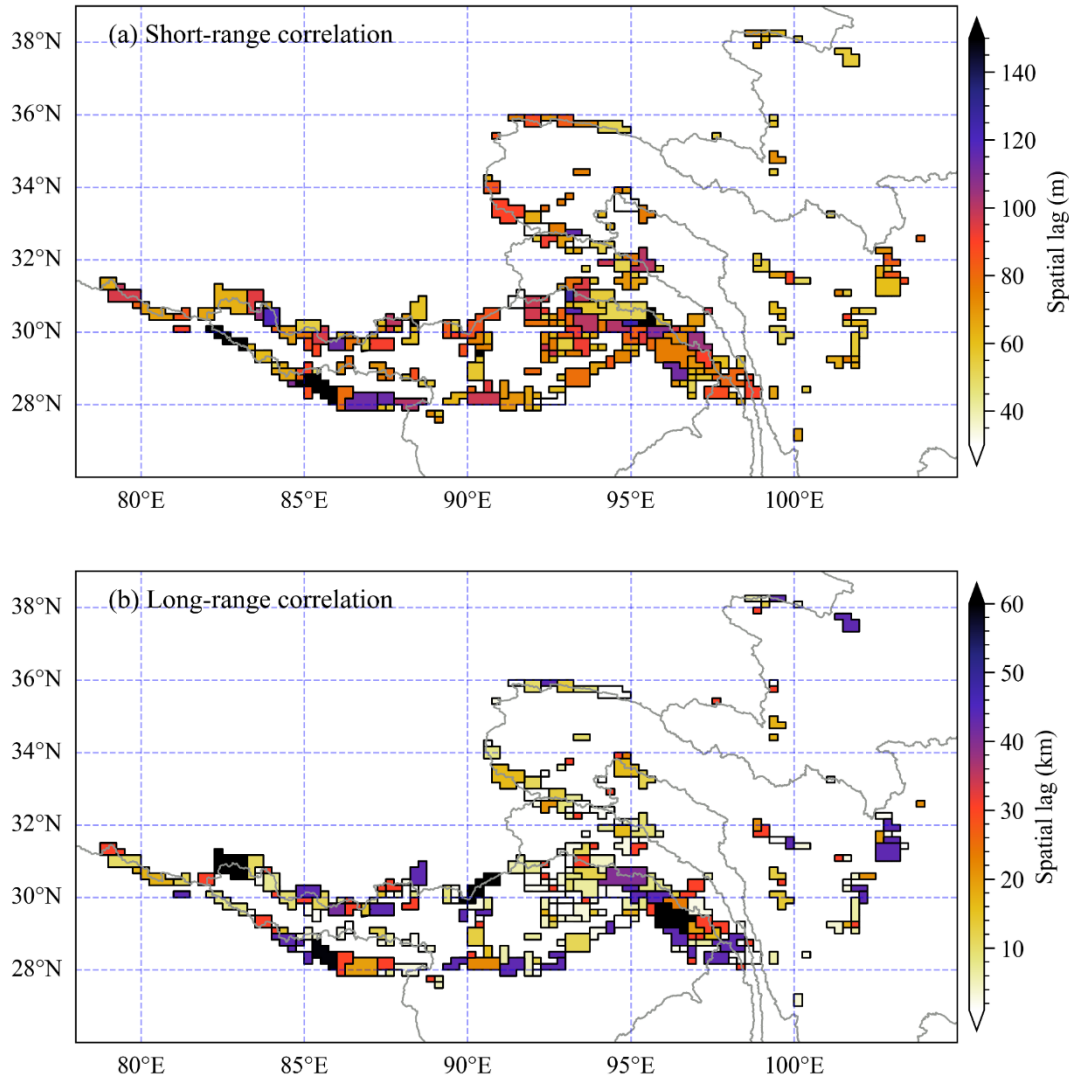

**Figure S5.** Short-range (a) and long-range (b) correlations of surface elevation difference in different glacier groups. Basin-averaged short-range correlation distance is  $\sim 95$  m and long-range correlation distance is  $\sim 16.26$  km.
